# Supplementary material
Source: PubMed Central journal article supplement (PMC2696345)

### **Legend to supplemental figure 1. Processing of calreticulin in placental tissue extracts**

Rat placenta (gestational day 15.5) was homogenized in 20 mM Tris/HCl, 1 mM EDTA, 1% CHAPS, pH 7.4 and diluted to 1 mg/ml. Samples were incubated at 37°C for 0, 2, 4, or 6 h in: (A) the absence of additional protease inhibitors, or (B) the presence of a cathepsin P specific inhibitor, Cbz-Trp-Trp-4-cyclohexanone-Trp-Phe-OMe (1  $\mu$ M), (C) a protease inhibitor cocktail (Sigma P8465, diluted as recommended by the manufacturer, or (D) both inhibitors. At each time point, 10  $\mu$ g protein was removed and proteins were separated by SDS/PAGE prior to Western blotting for calreticulin.

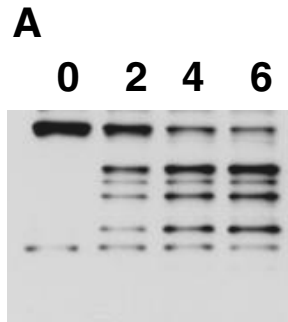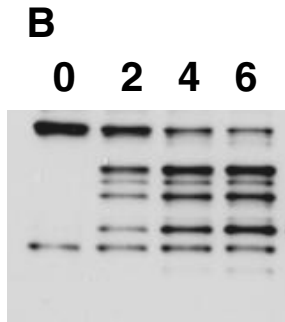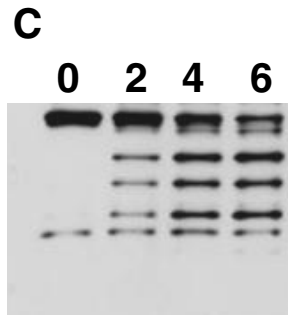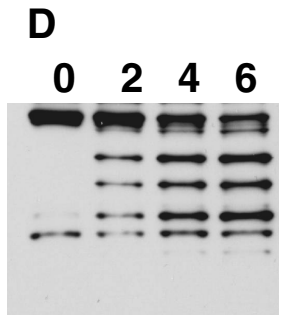

Supplement: gap029_1.pdf [file gap029_1.pdf]
